# Supplementary material
Source: publisher figshare collection journal article supplement (https://tandf.figshare.com/ndownloader/files/13651130)

| **A novel poly(ethyleneoxide)-based magnetic nanocomposite catalyst for highly efficient multicomponent synthesis of pyran derivatives**  Ali Maleki,a,* Mojtaba Azizia,b and Zeynab Emdadia  *aCatalysts and Organic Synthesis Research Laboratory, Department of Chemistry, Iran*  *University of Science and Technology, Tehran 16846-13114, Iran*  *bDepartment of Chemistry, K.N. Toosi University of Technology, P.O. Box 15875-4416, Tehran, Iran*  *Corresponding author. Tel.: +98 21 77240640-50; Fax: +98 21 73021584. E-mail: [maleki@iust.ac.ir](mailto:maleki@iust.ac.ir) (Ali Maleki).  **Table of contents**   | ***Subject*** | ***Page*** | | --- | --- | | *Characterization of the selected product(4g)*  FT-IR spectrum of compound 4g (Figure S1)…………………………………… | S2 | | 1H NMR spectra of selected compounds (Figure S2-S4)……………….……….. | S3-S10 | |
| --- | --- | --- | --- | --- | --- | --- |

*Spectral data of the selected products*

5-Ethoxycarbonyl-2-amino-4-(3-nitrophenyl)-3-cyano-6-methyl-4*H*-pyran; IR (KBr) (υmax, cm−1): 3402, 3326, 3080, 2987, 2925, 2191, 1691, 1674, 1647, 1604, 1529, 1344, 1267, 1062, 1000; 1HNMR (500 MHz, DMSO-*d6*): 1.023 (t, 3H, CH3, *J* = 6.9 Hz), 2.35 (s, 3H, CH3), 3.95-3.98 (m, 2H, CH2), 4.52 (s, 1H, CH), 7.08 (s, 1H, NH2), 7.62-7.66 (m, 2H, Ar), 7.98 (s, 1H, Ar), 8.11 (d,1H , Ar, *J =* 6.8 Hz).


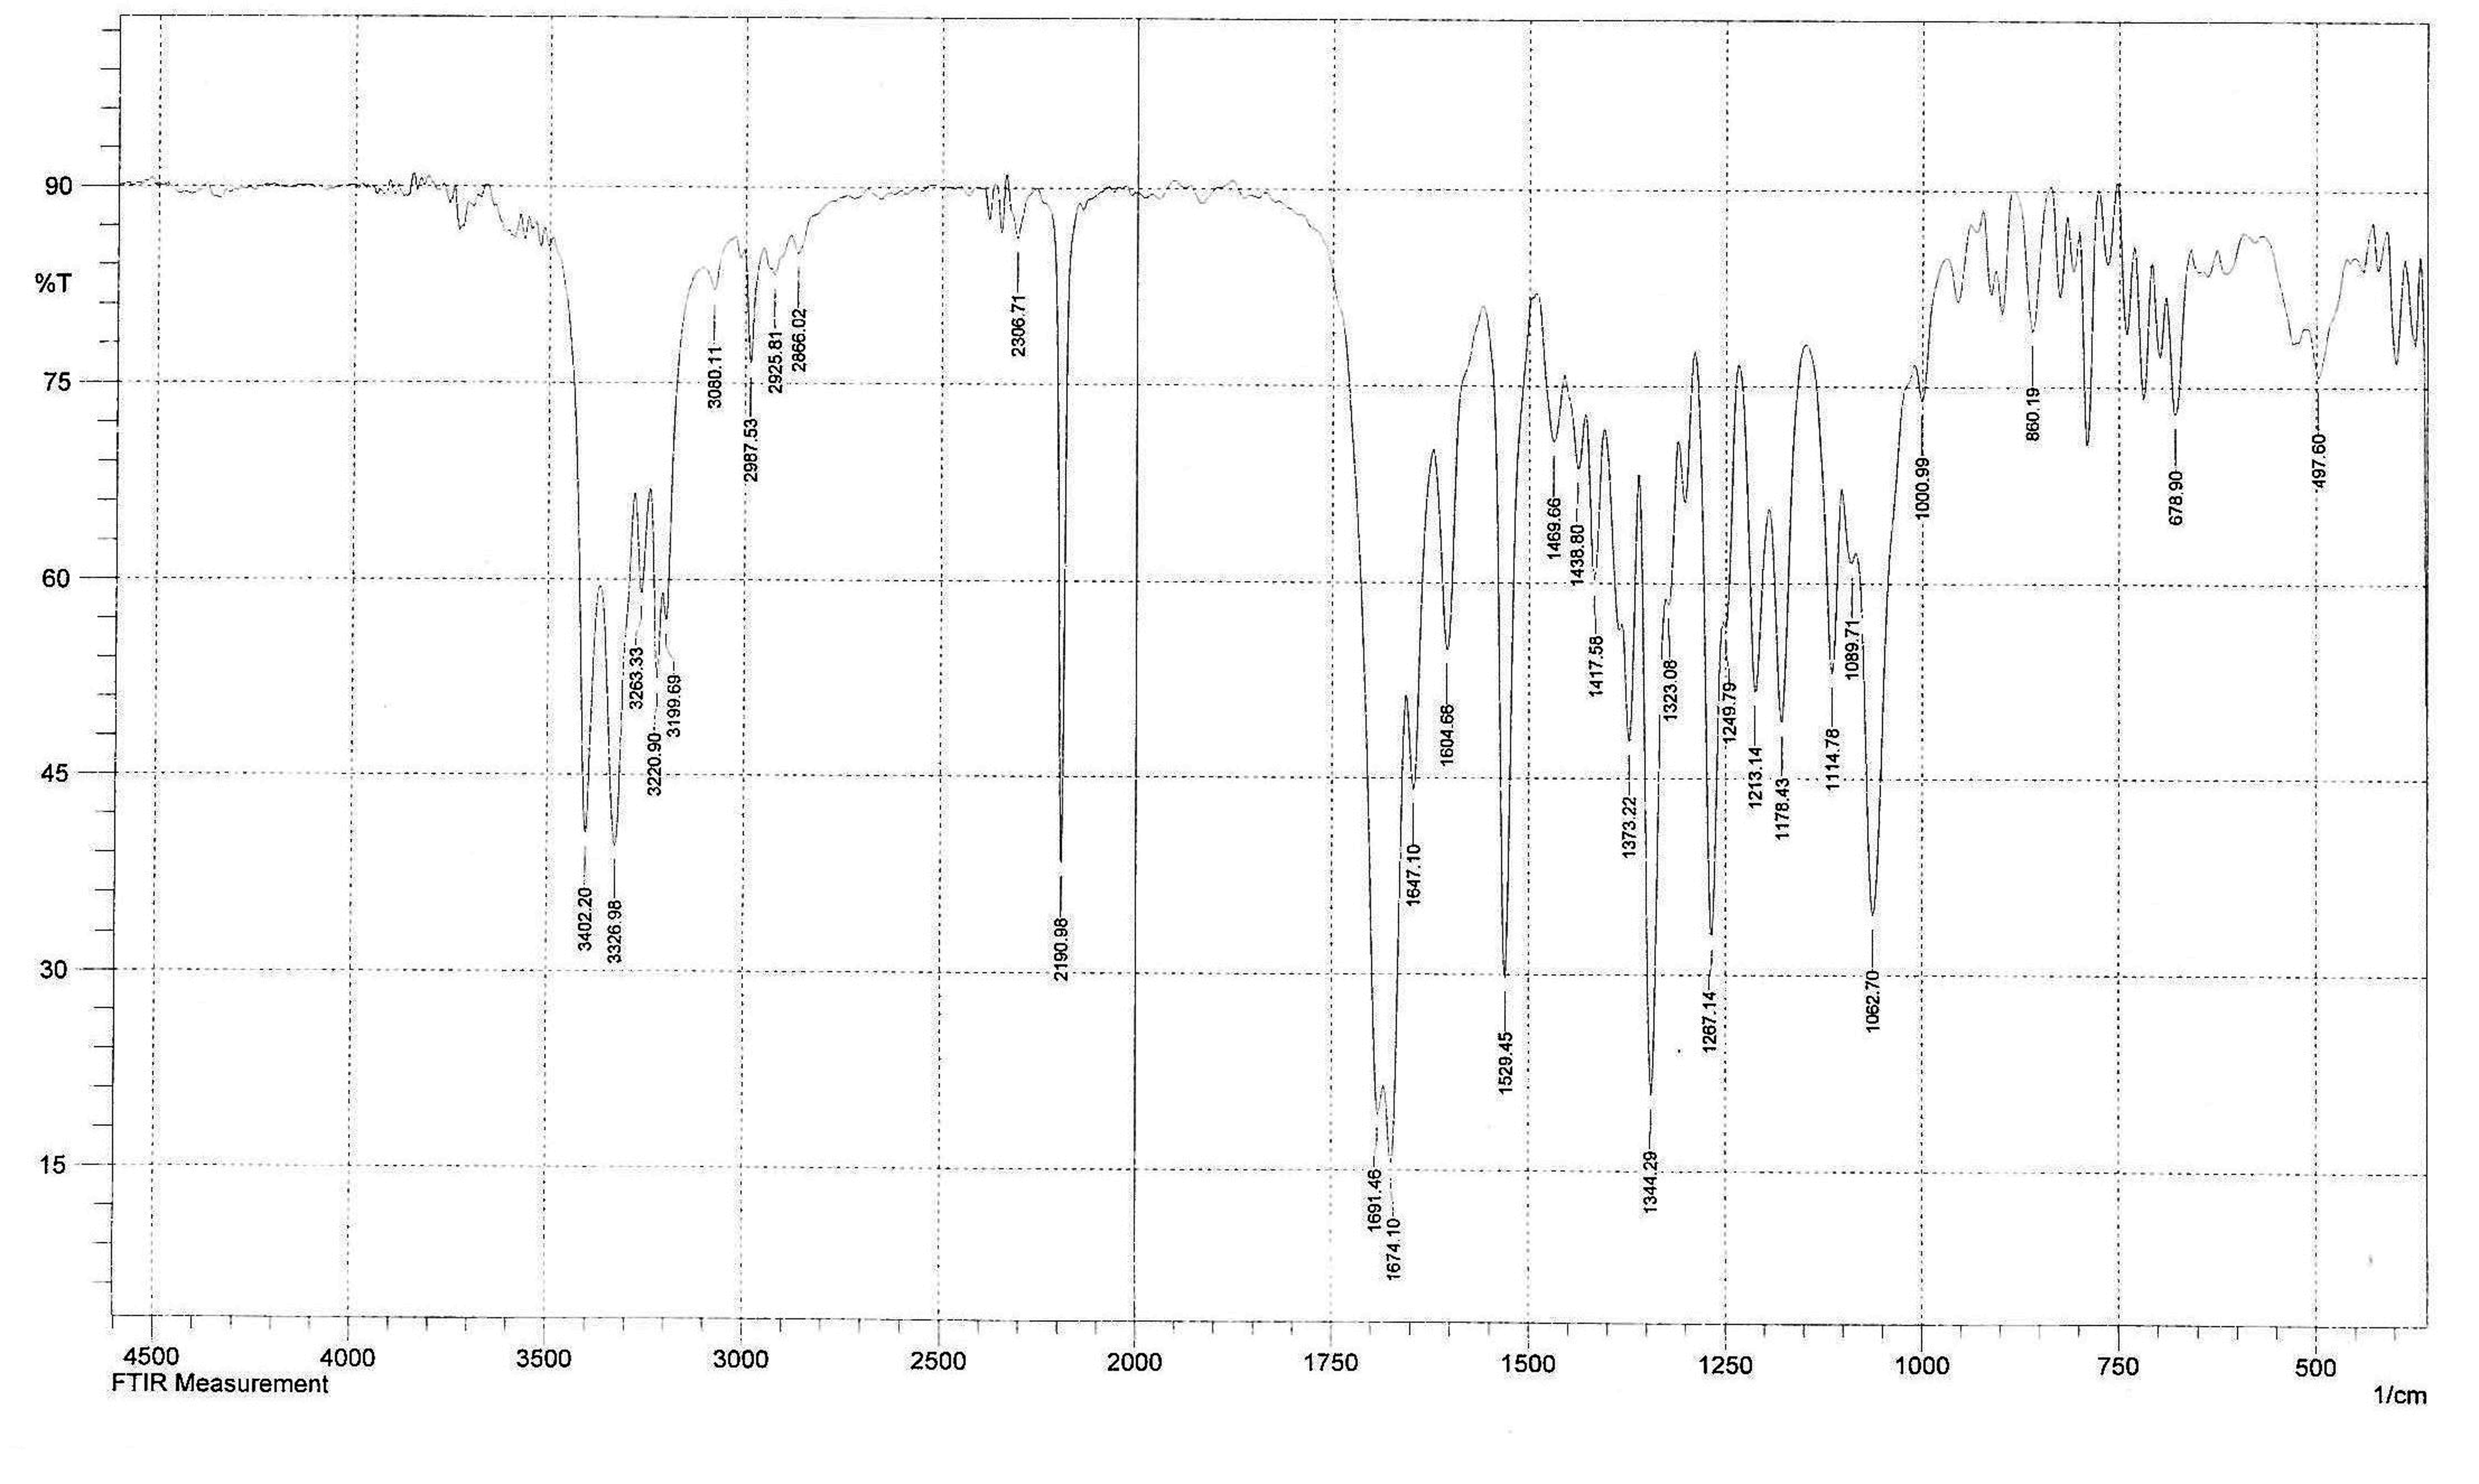


**Figure S1.** FT-IR spectrum of compound (**4g**) 3-Nitro-4H-pyran


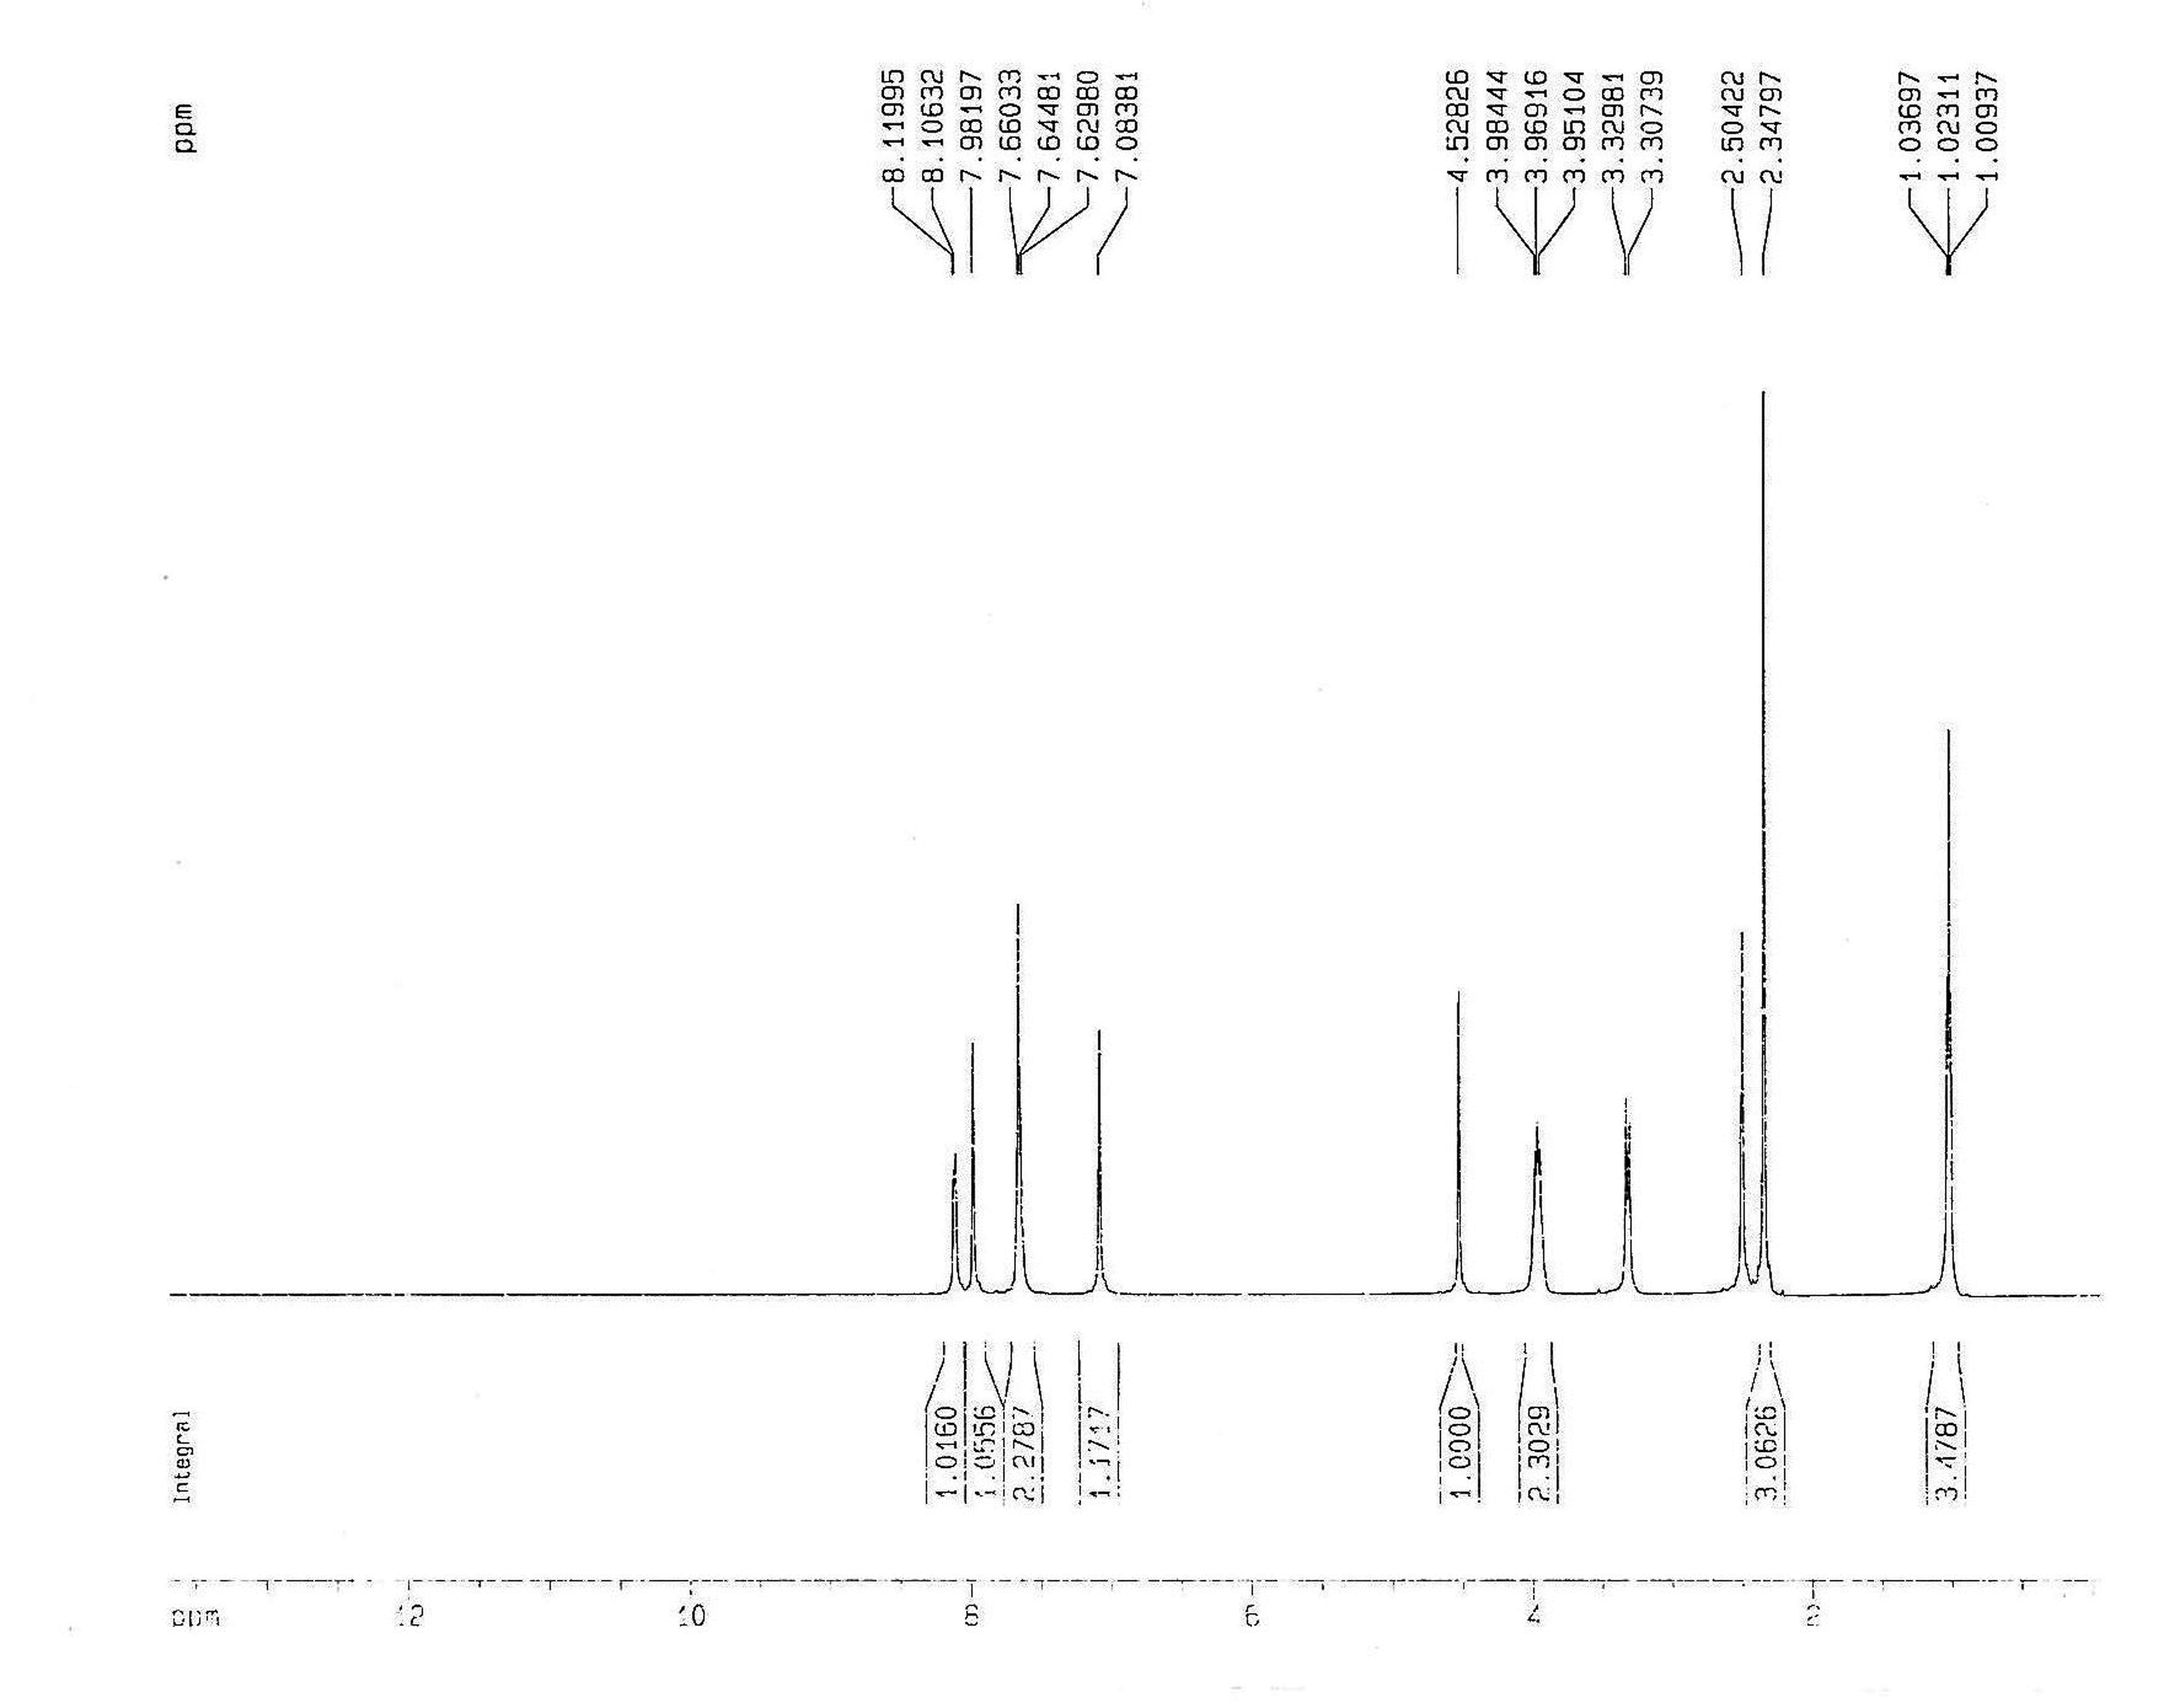


**Figure S2.** 1H NMR spectrum of compound (**4g**) 3-Nitro-4H-pyran


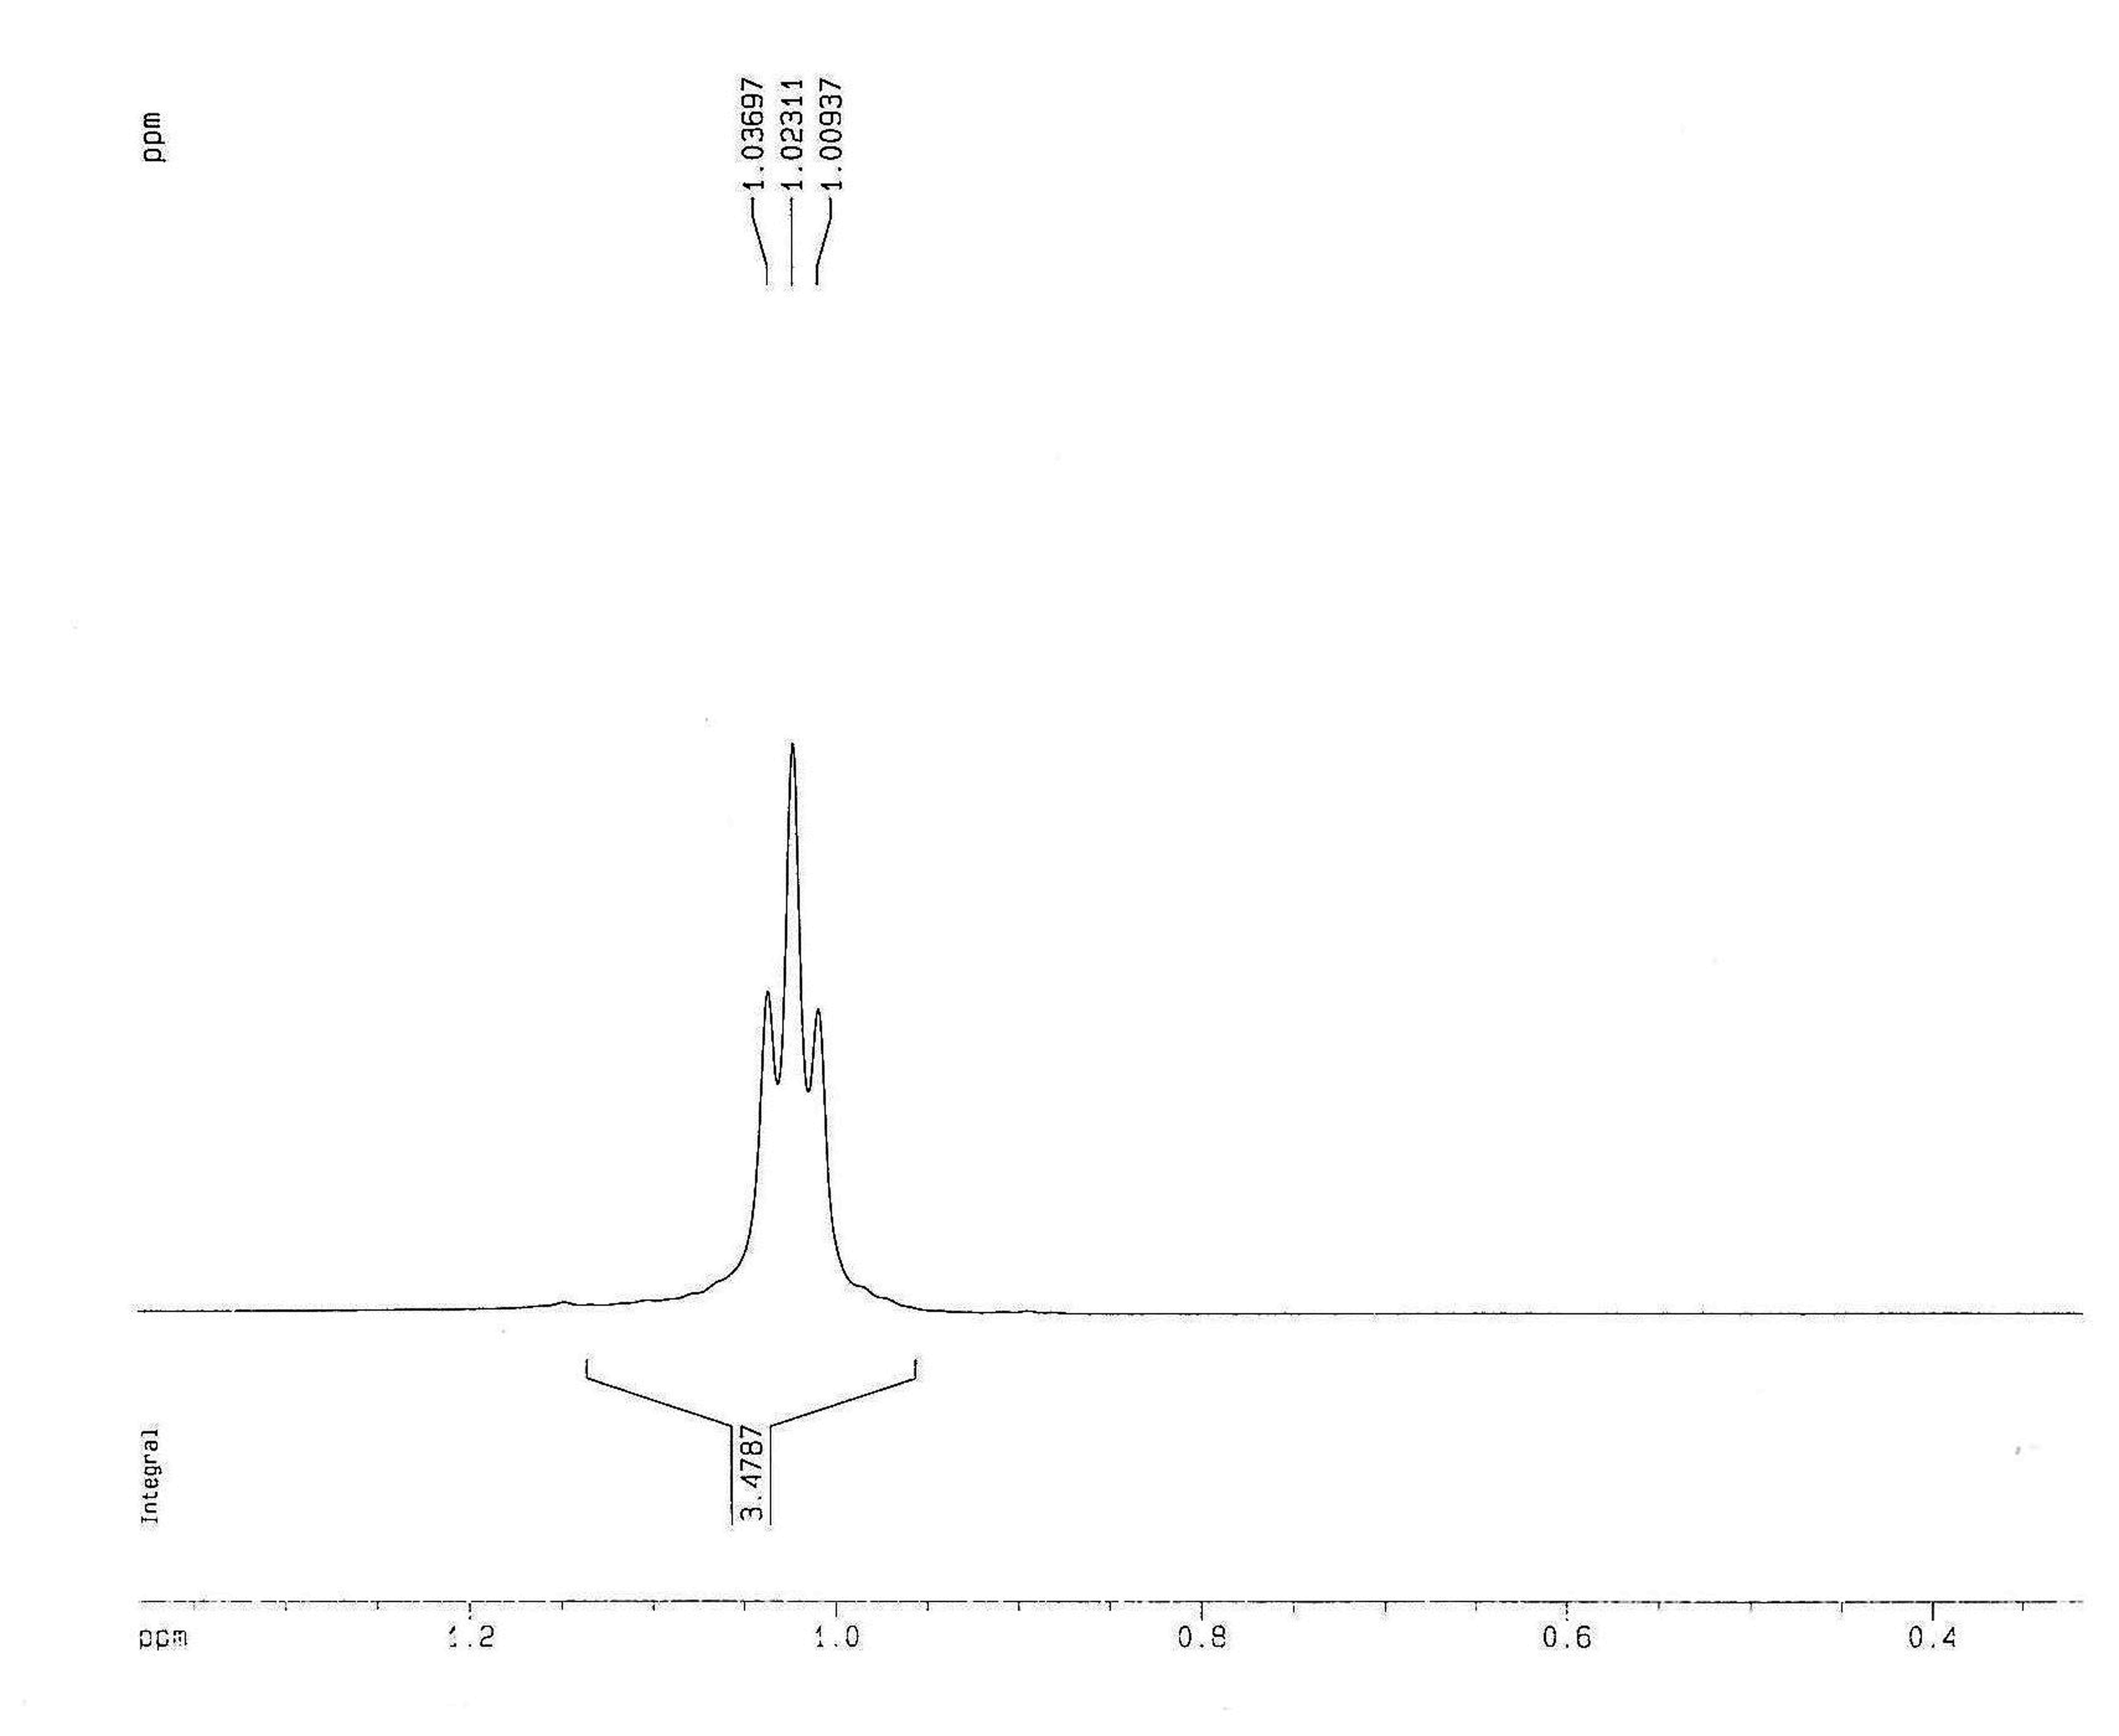


**Figure S3.** 1H NMR spectrum of compound (**4g**) 3-Nitro-4H-pyran


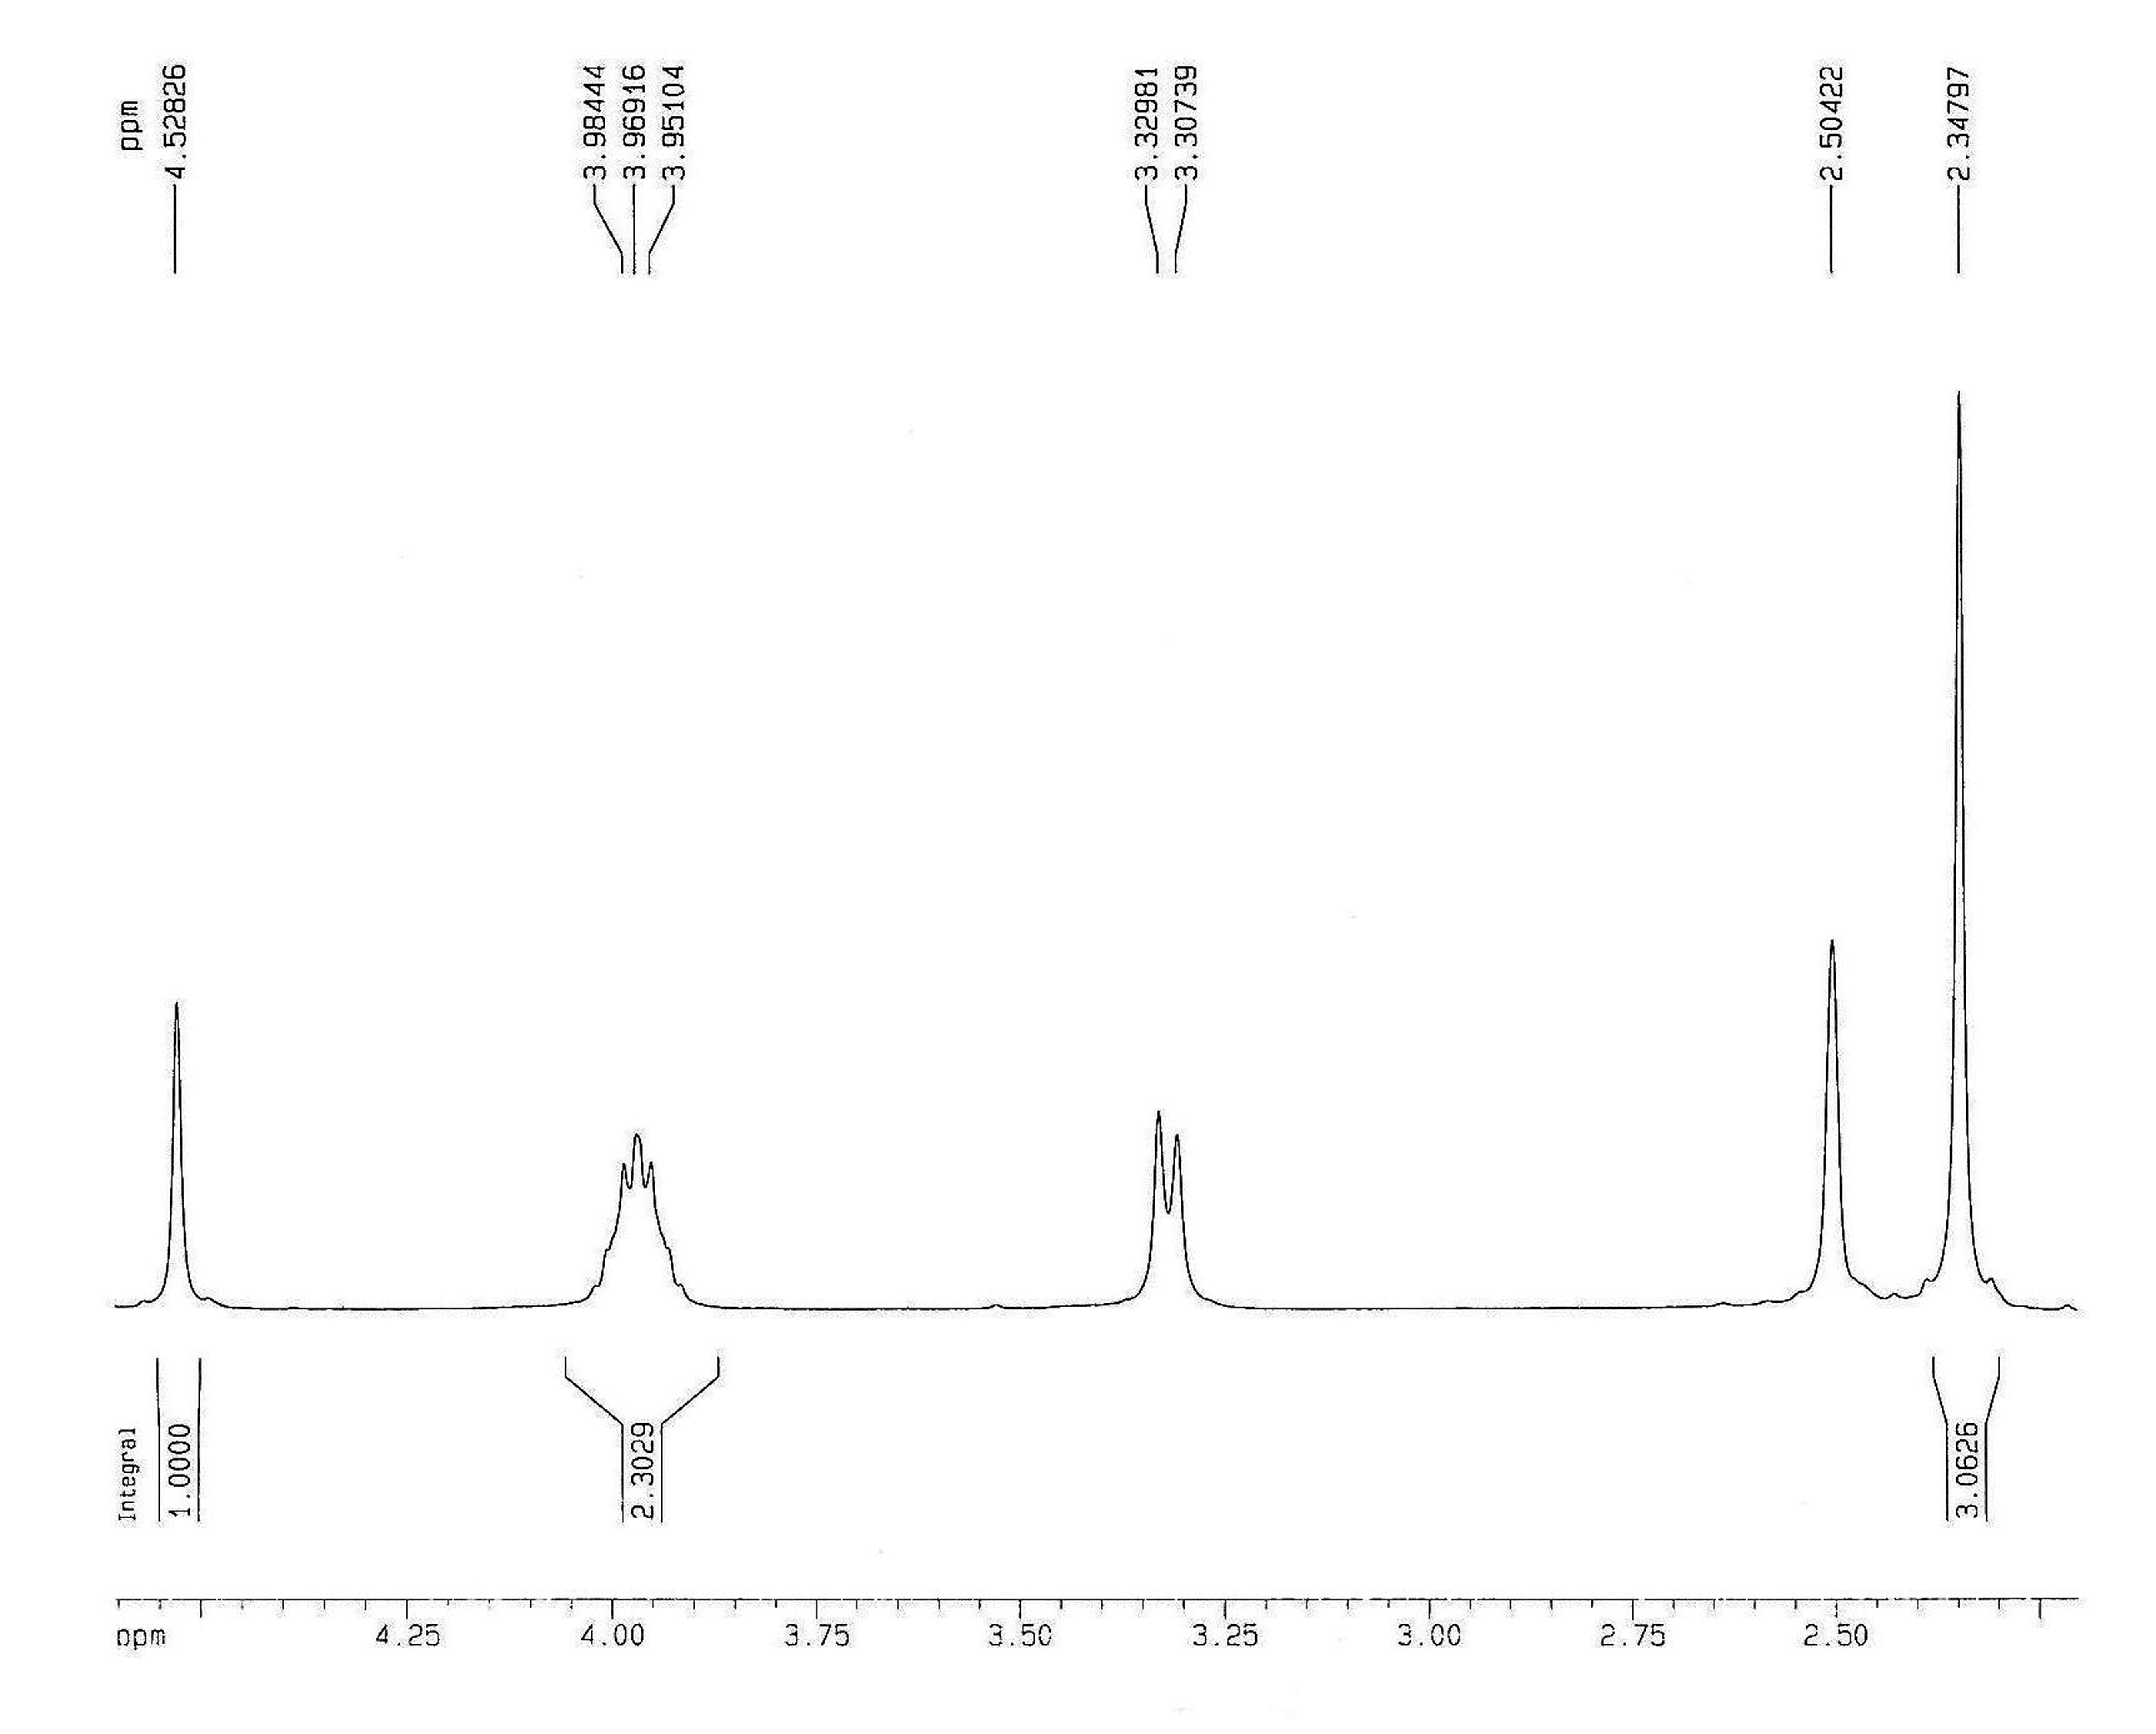


**Figure S4.** 1H NMR spectrum of compound (**4g**) 3-Nitro-4H-pyran


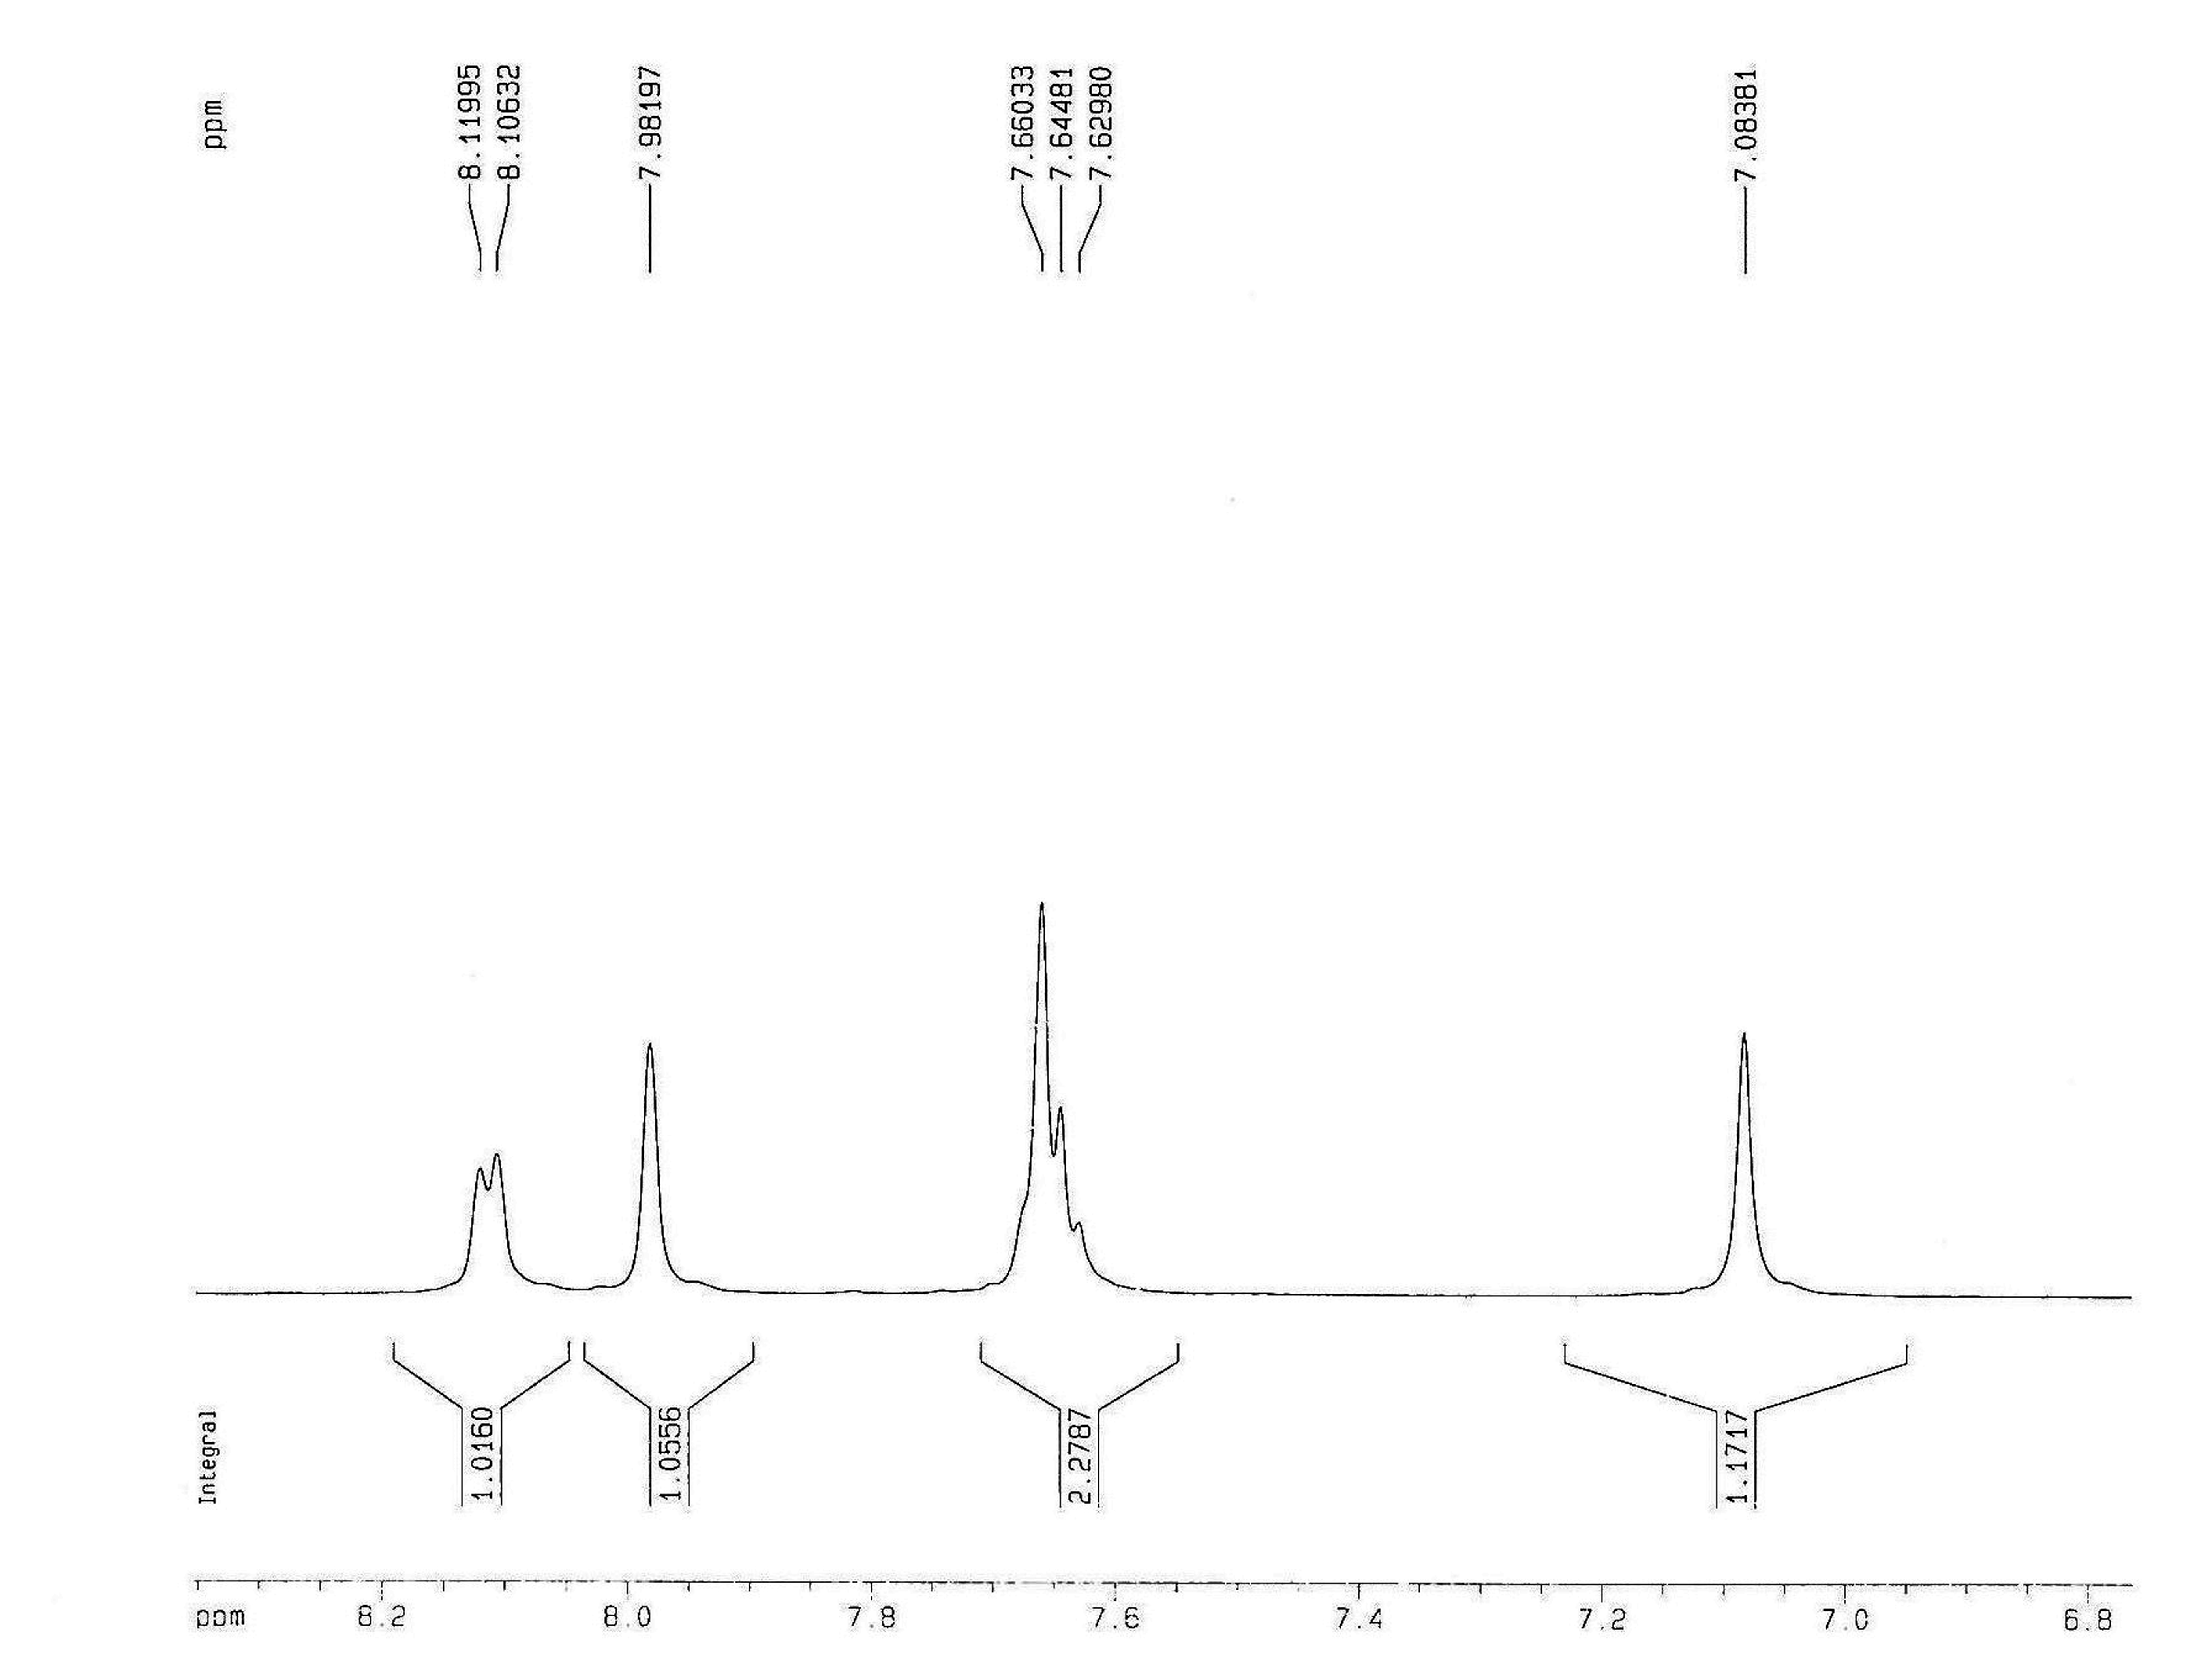


**Figure S5.** 1H NMR spectrum of compound (**4g**) 3-Nitro-4H-pyran


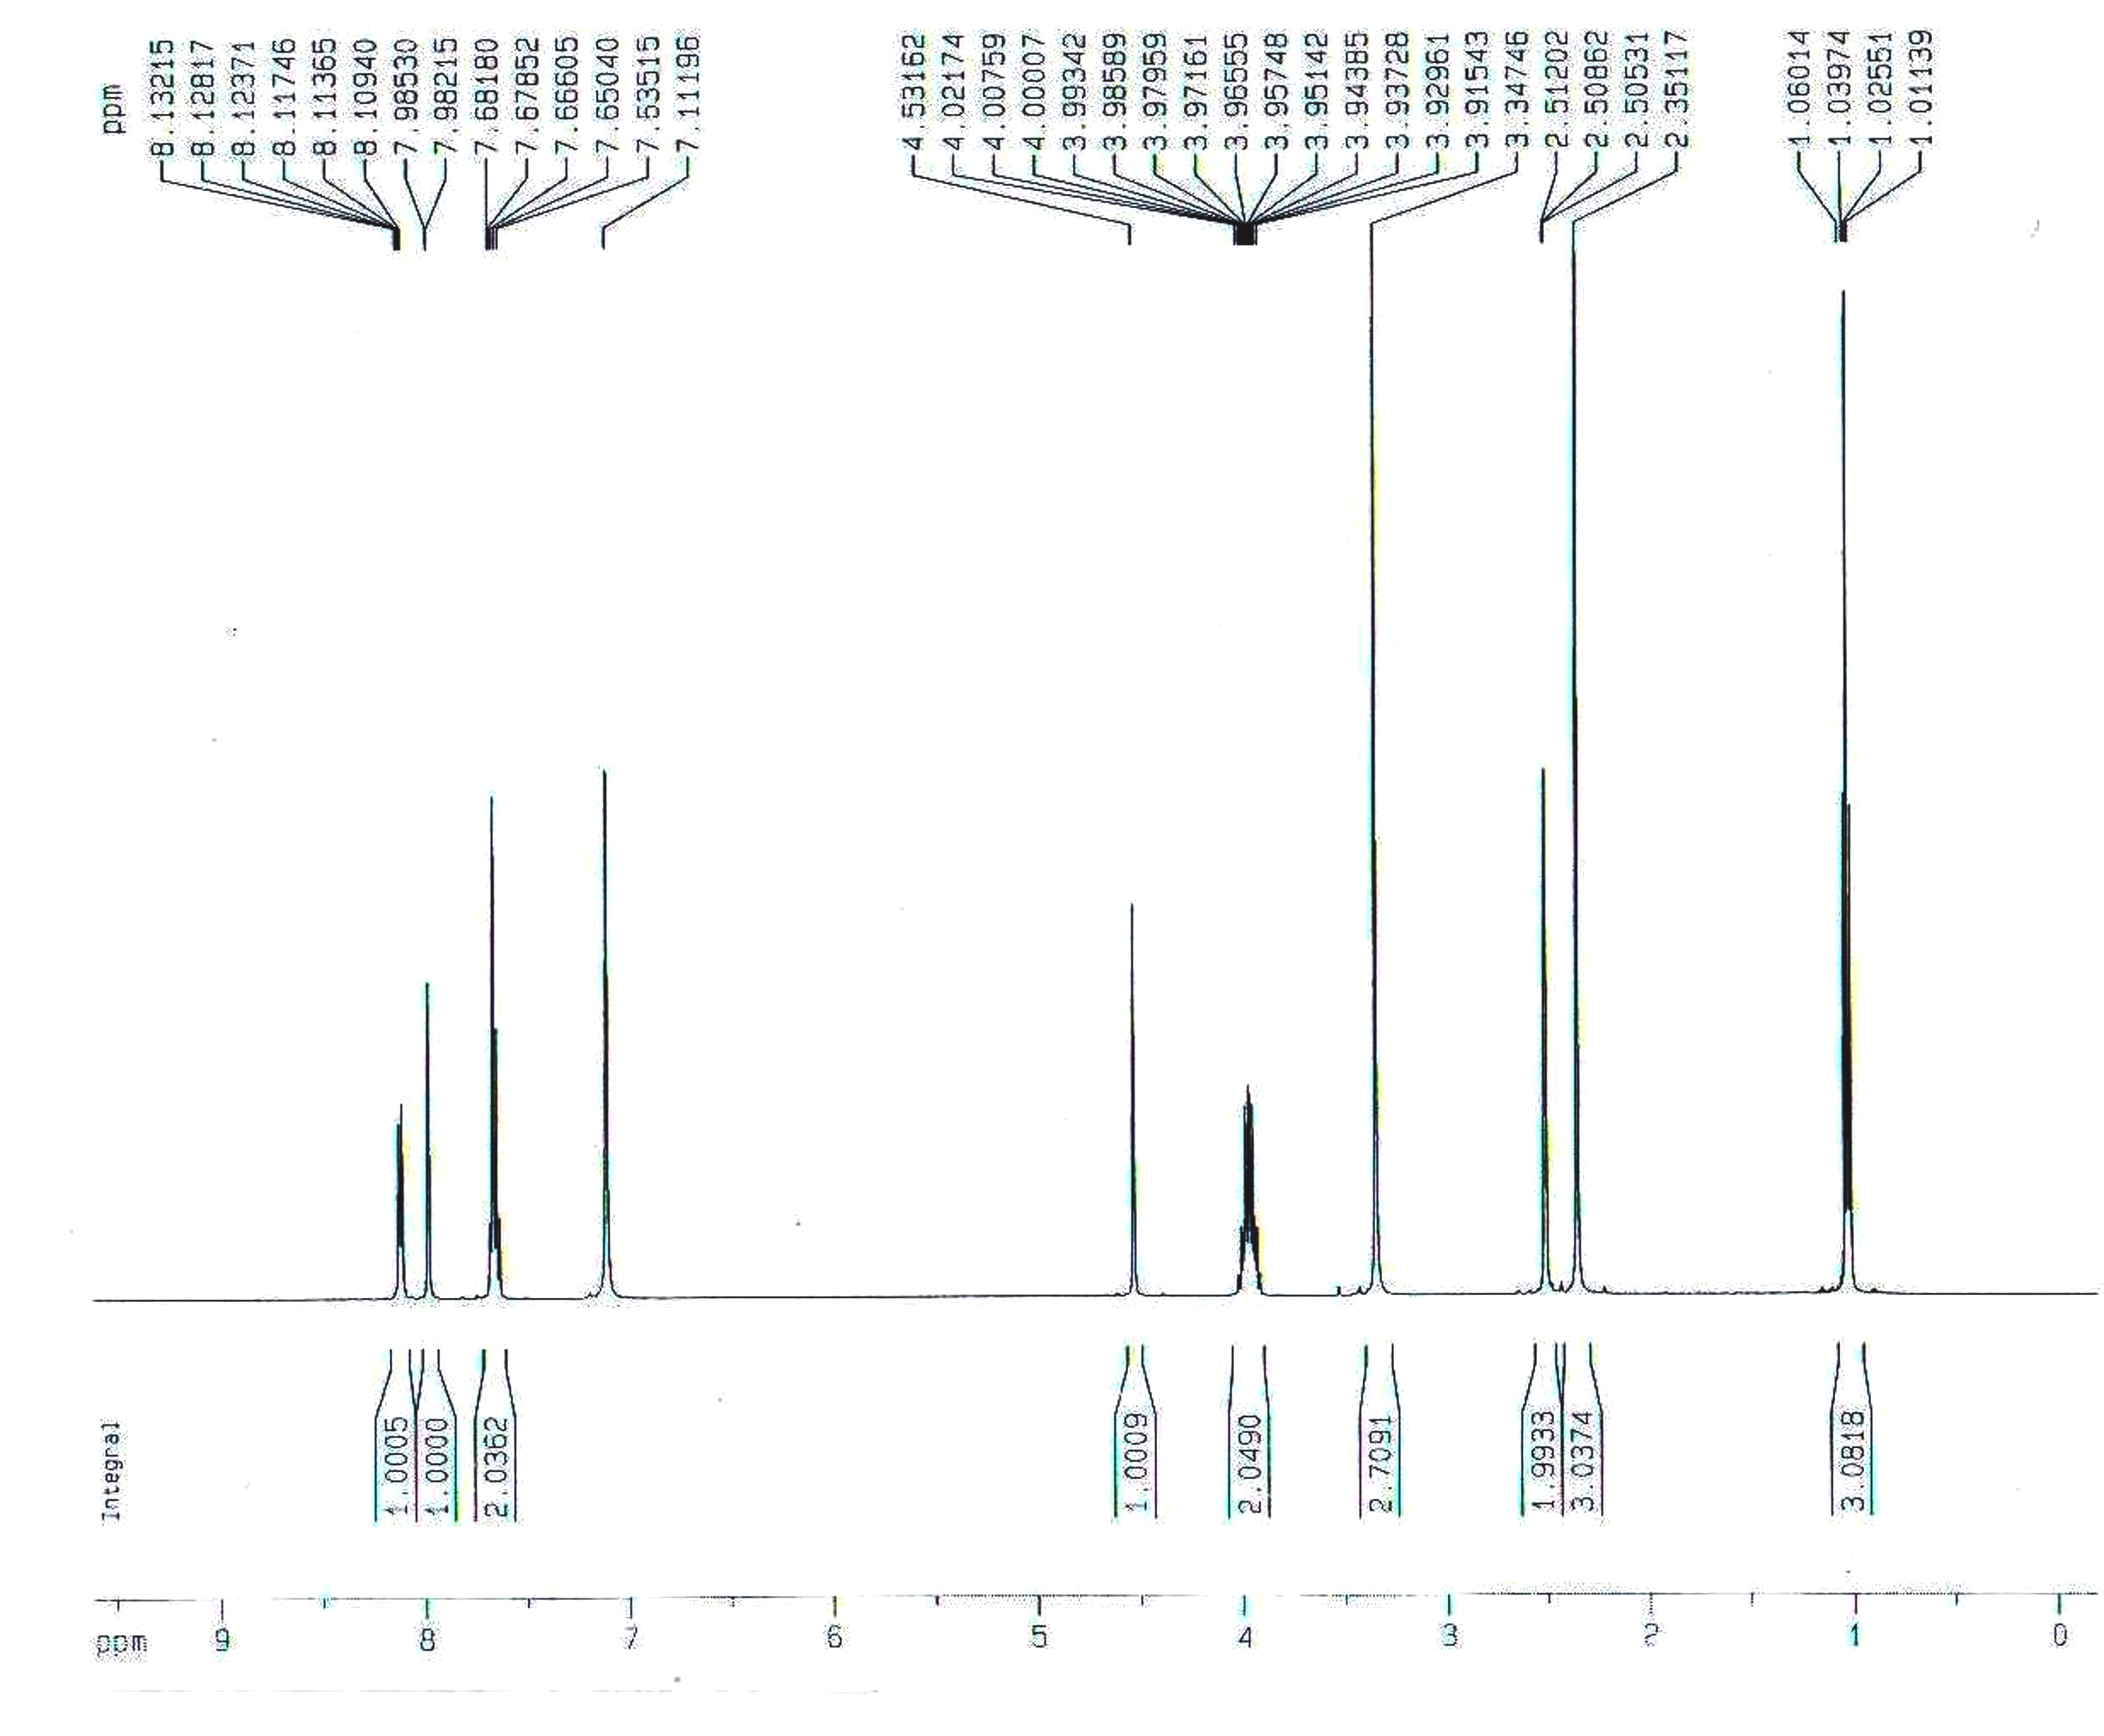


**Figure S6.** 1H NMR spectrum of compound (**4d**)


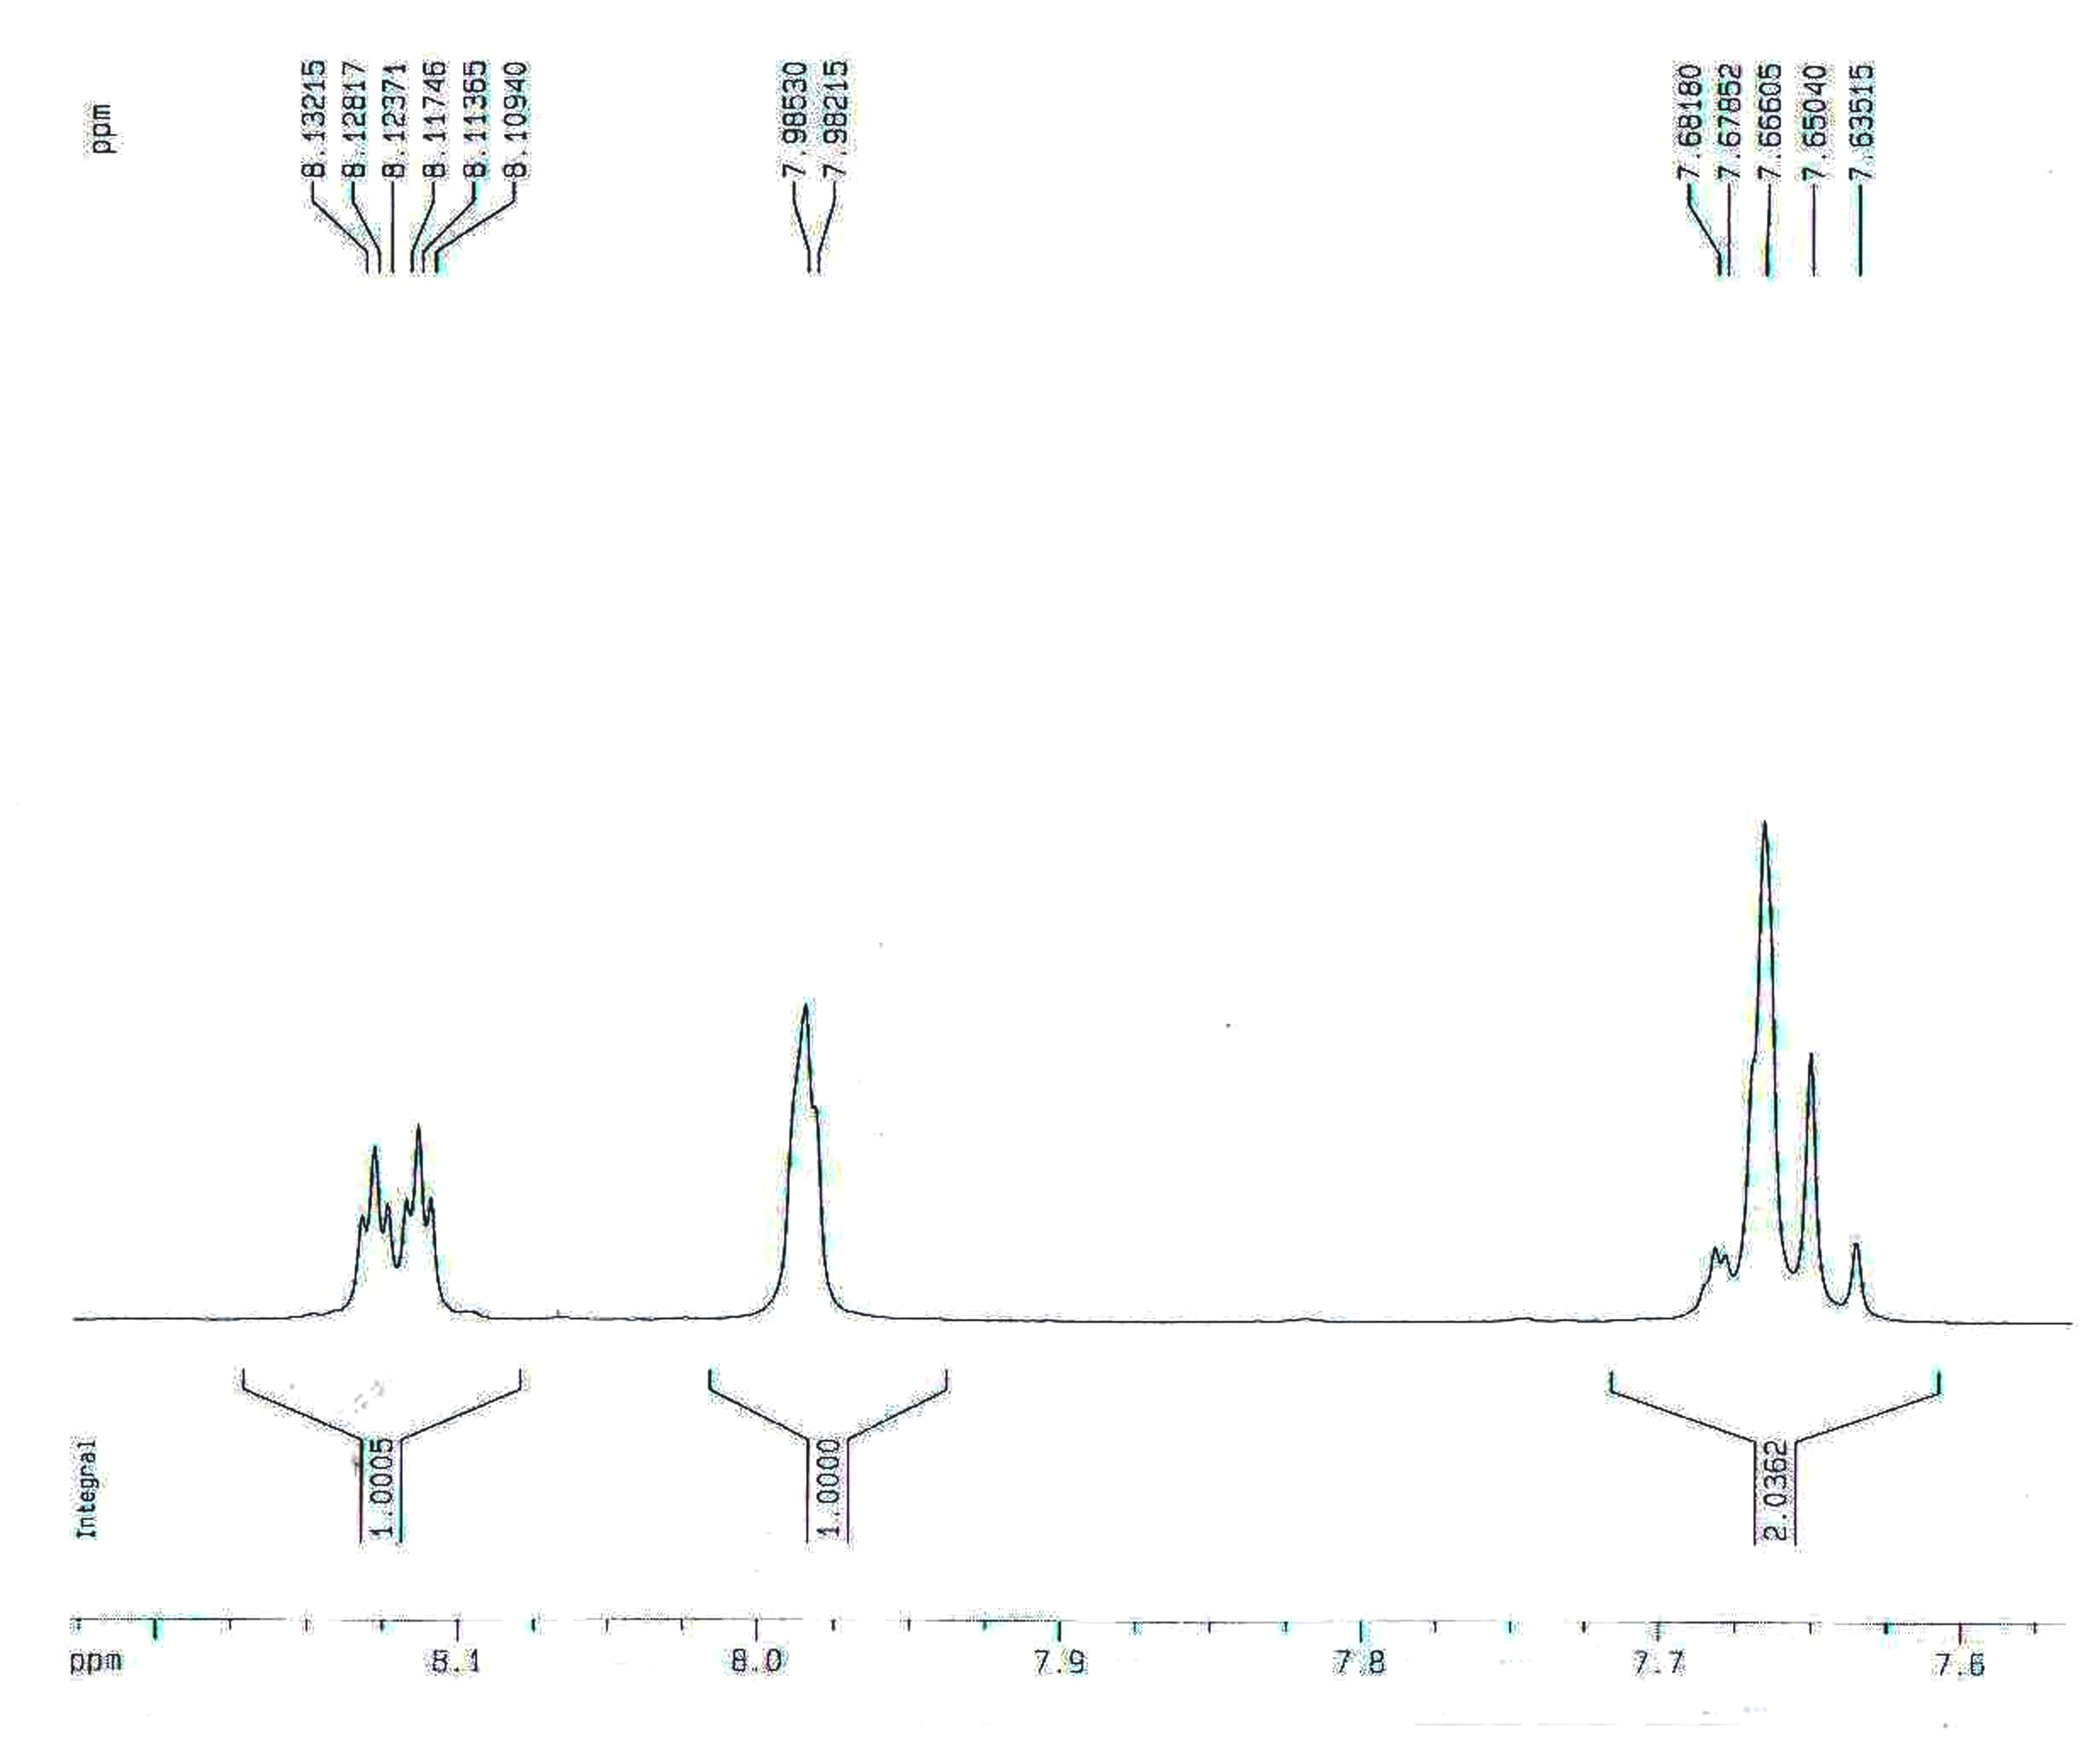


**Figure S7.** 1H NMR spectrum of compound (**4d**)


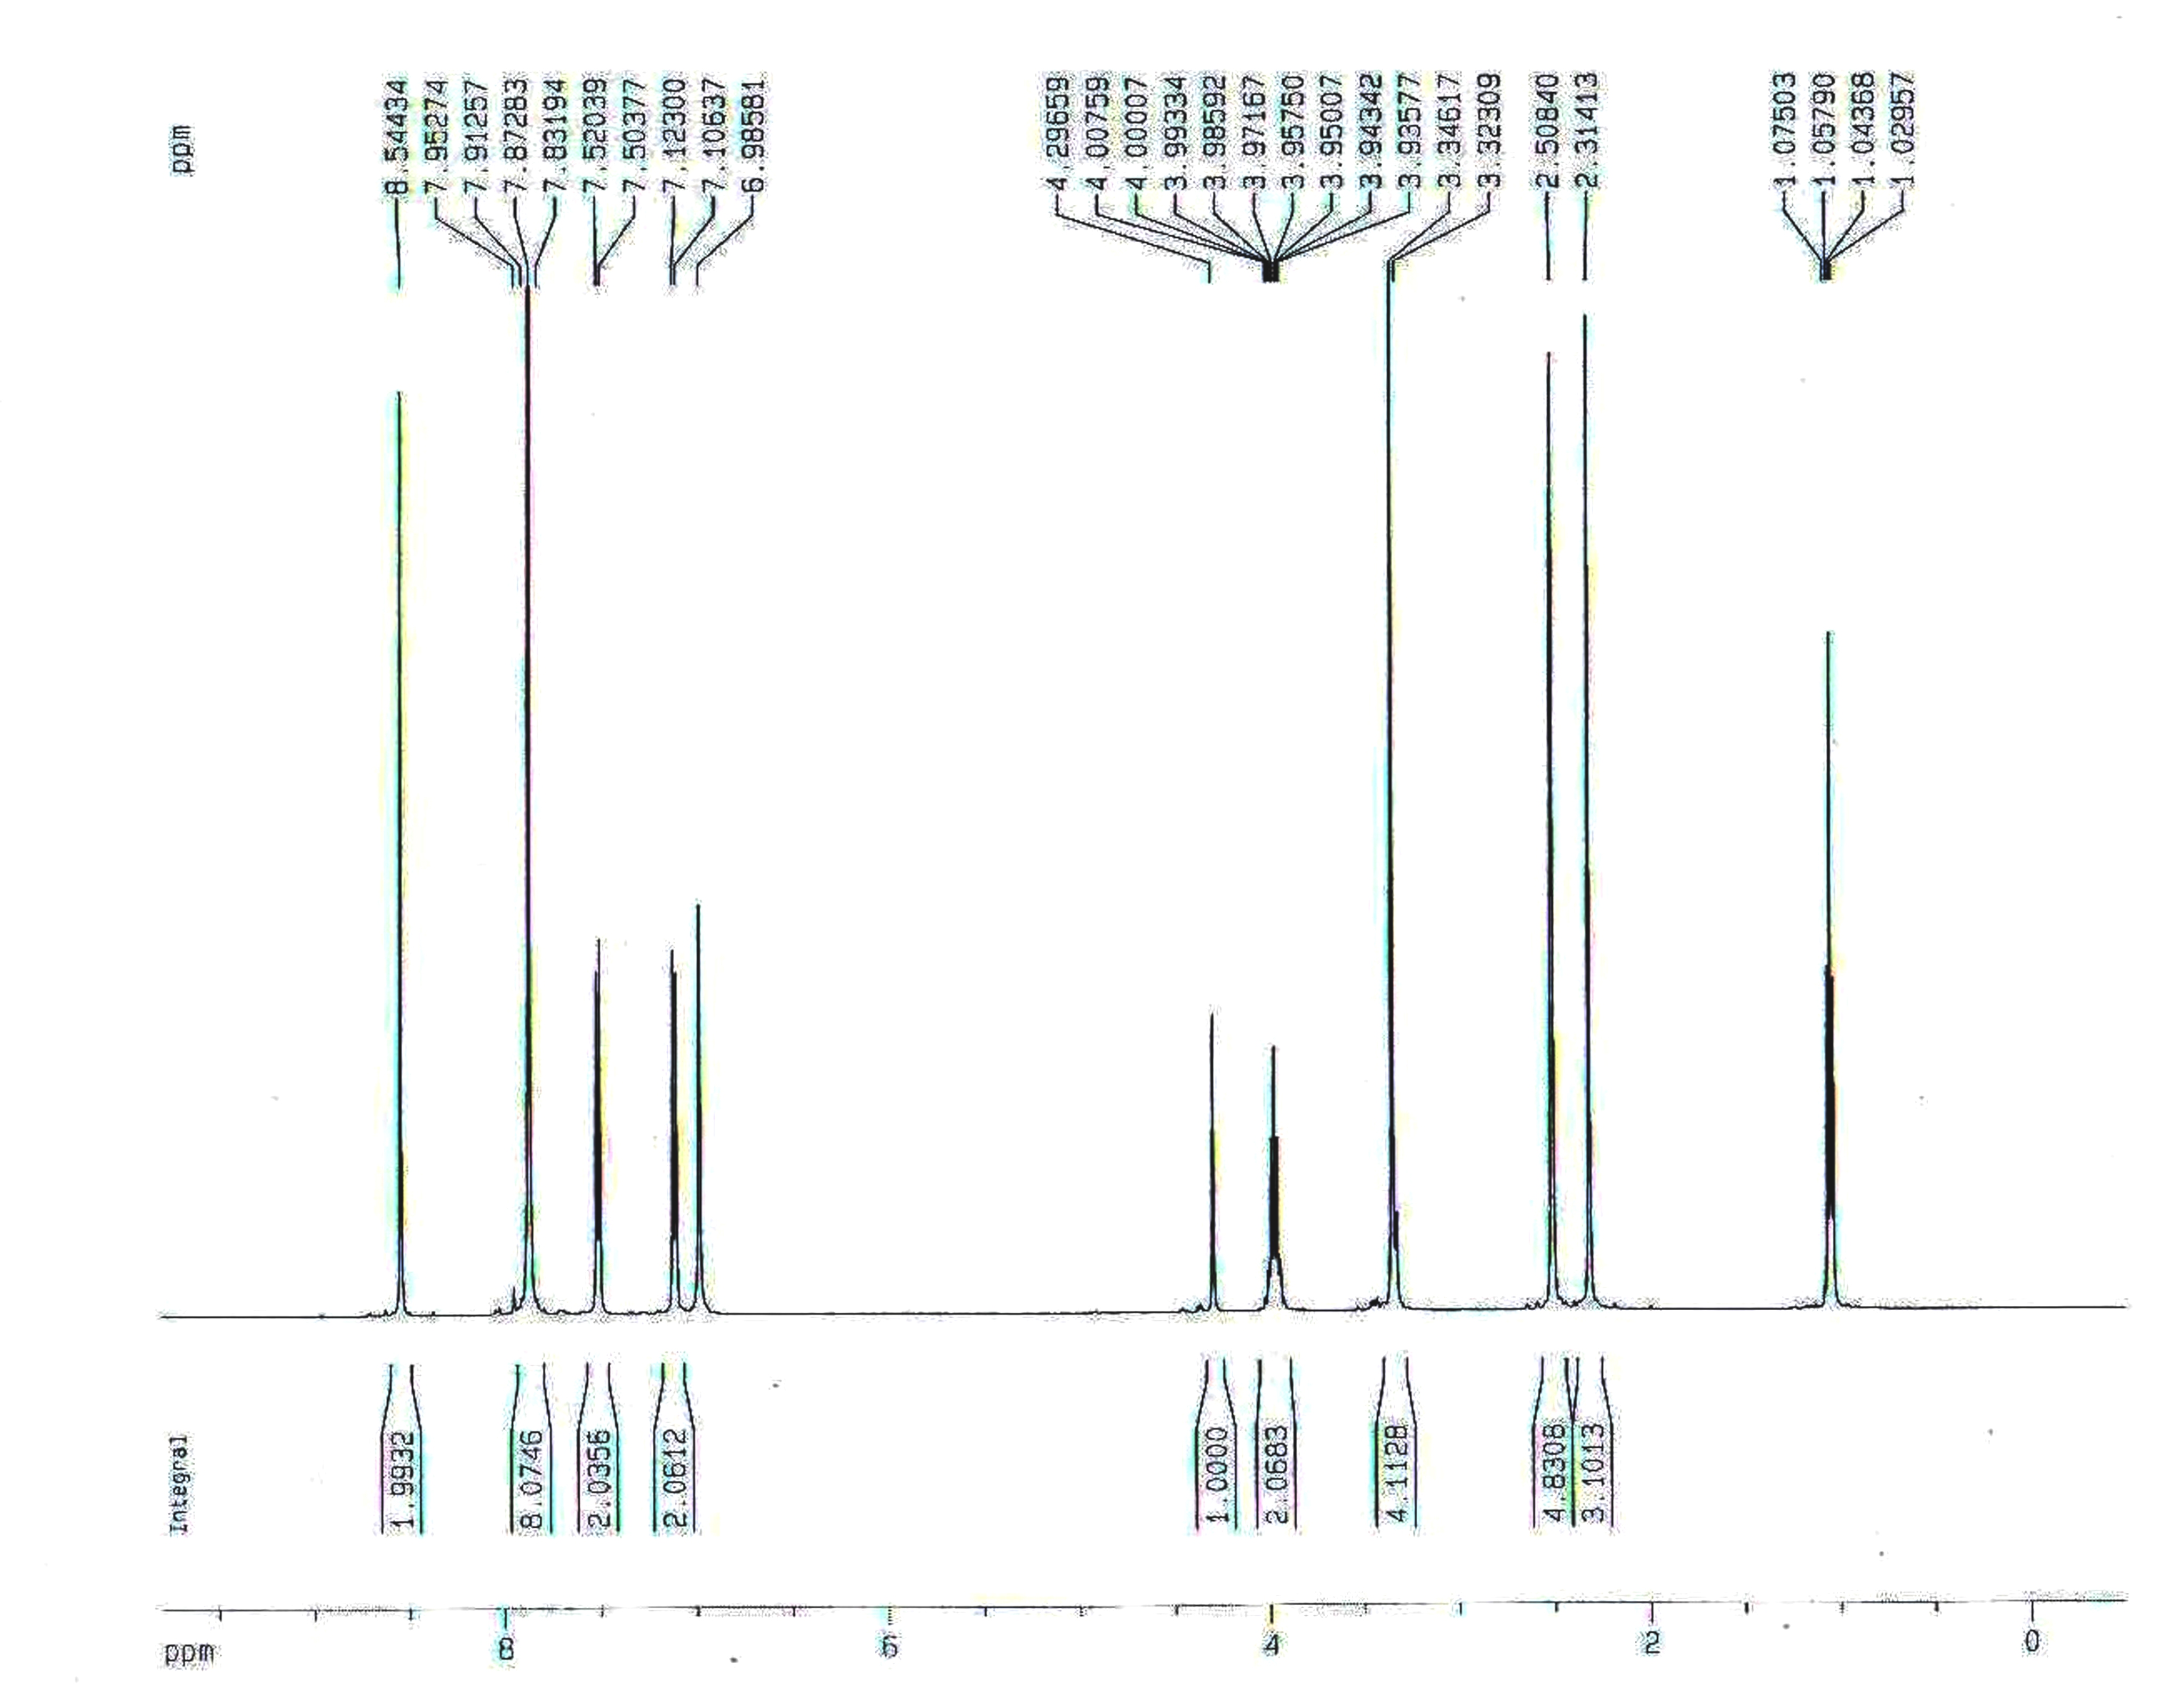


**Figure S8.** 1H NMR spectrum of compound (**4l**)


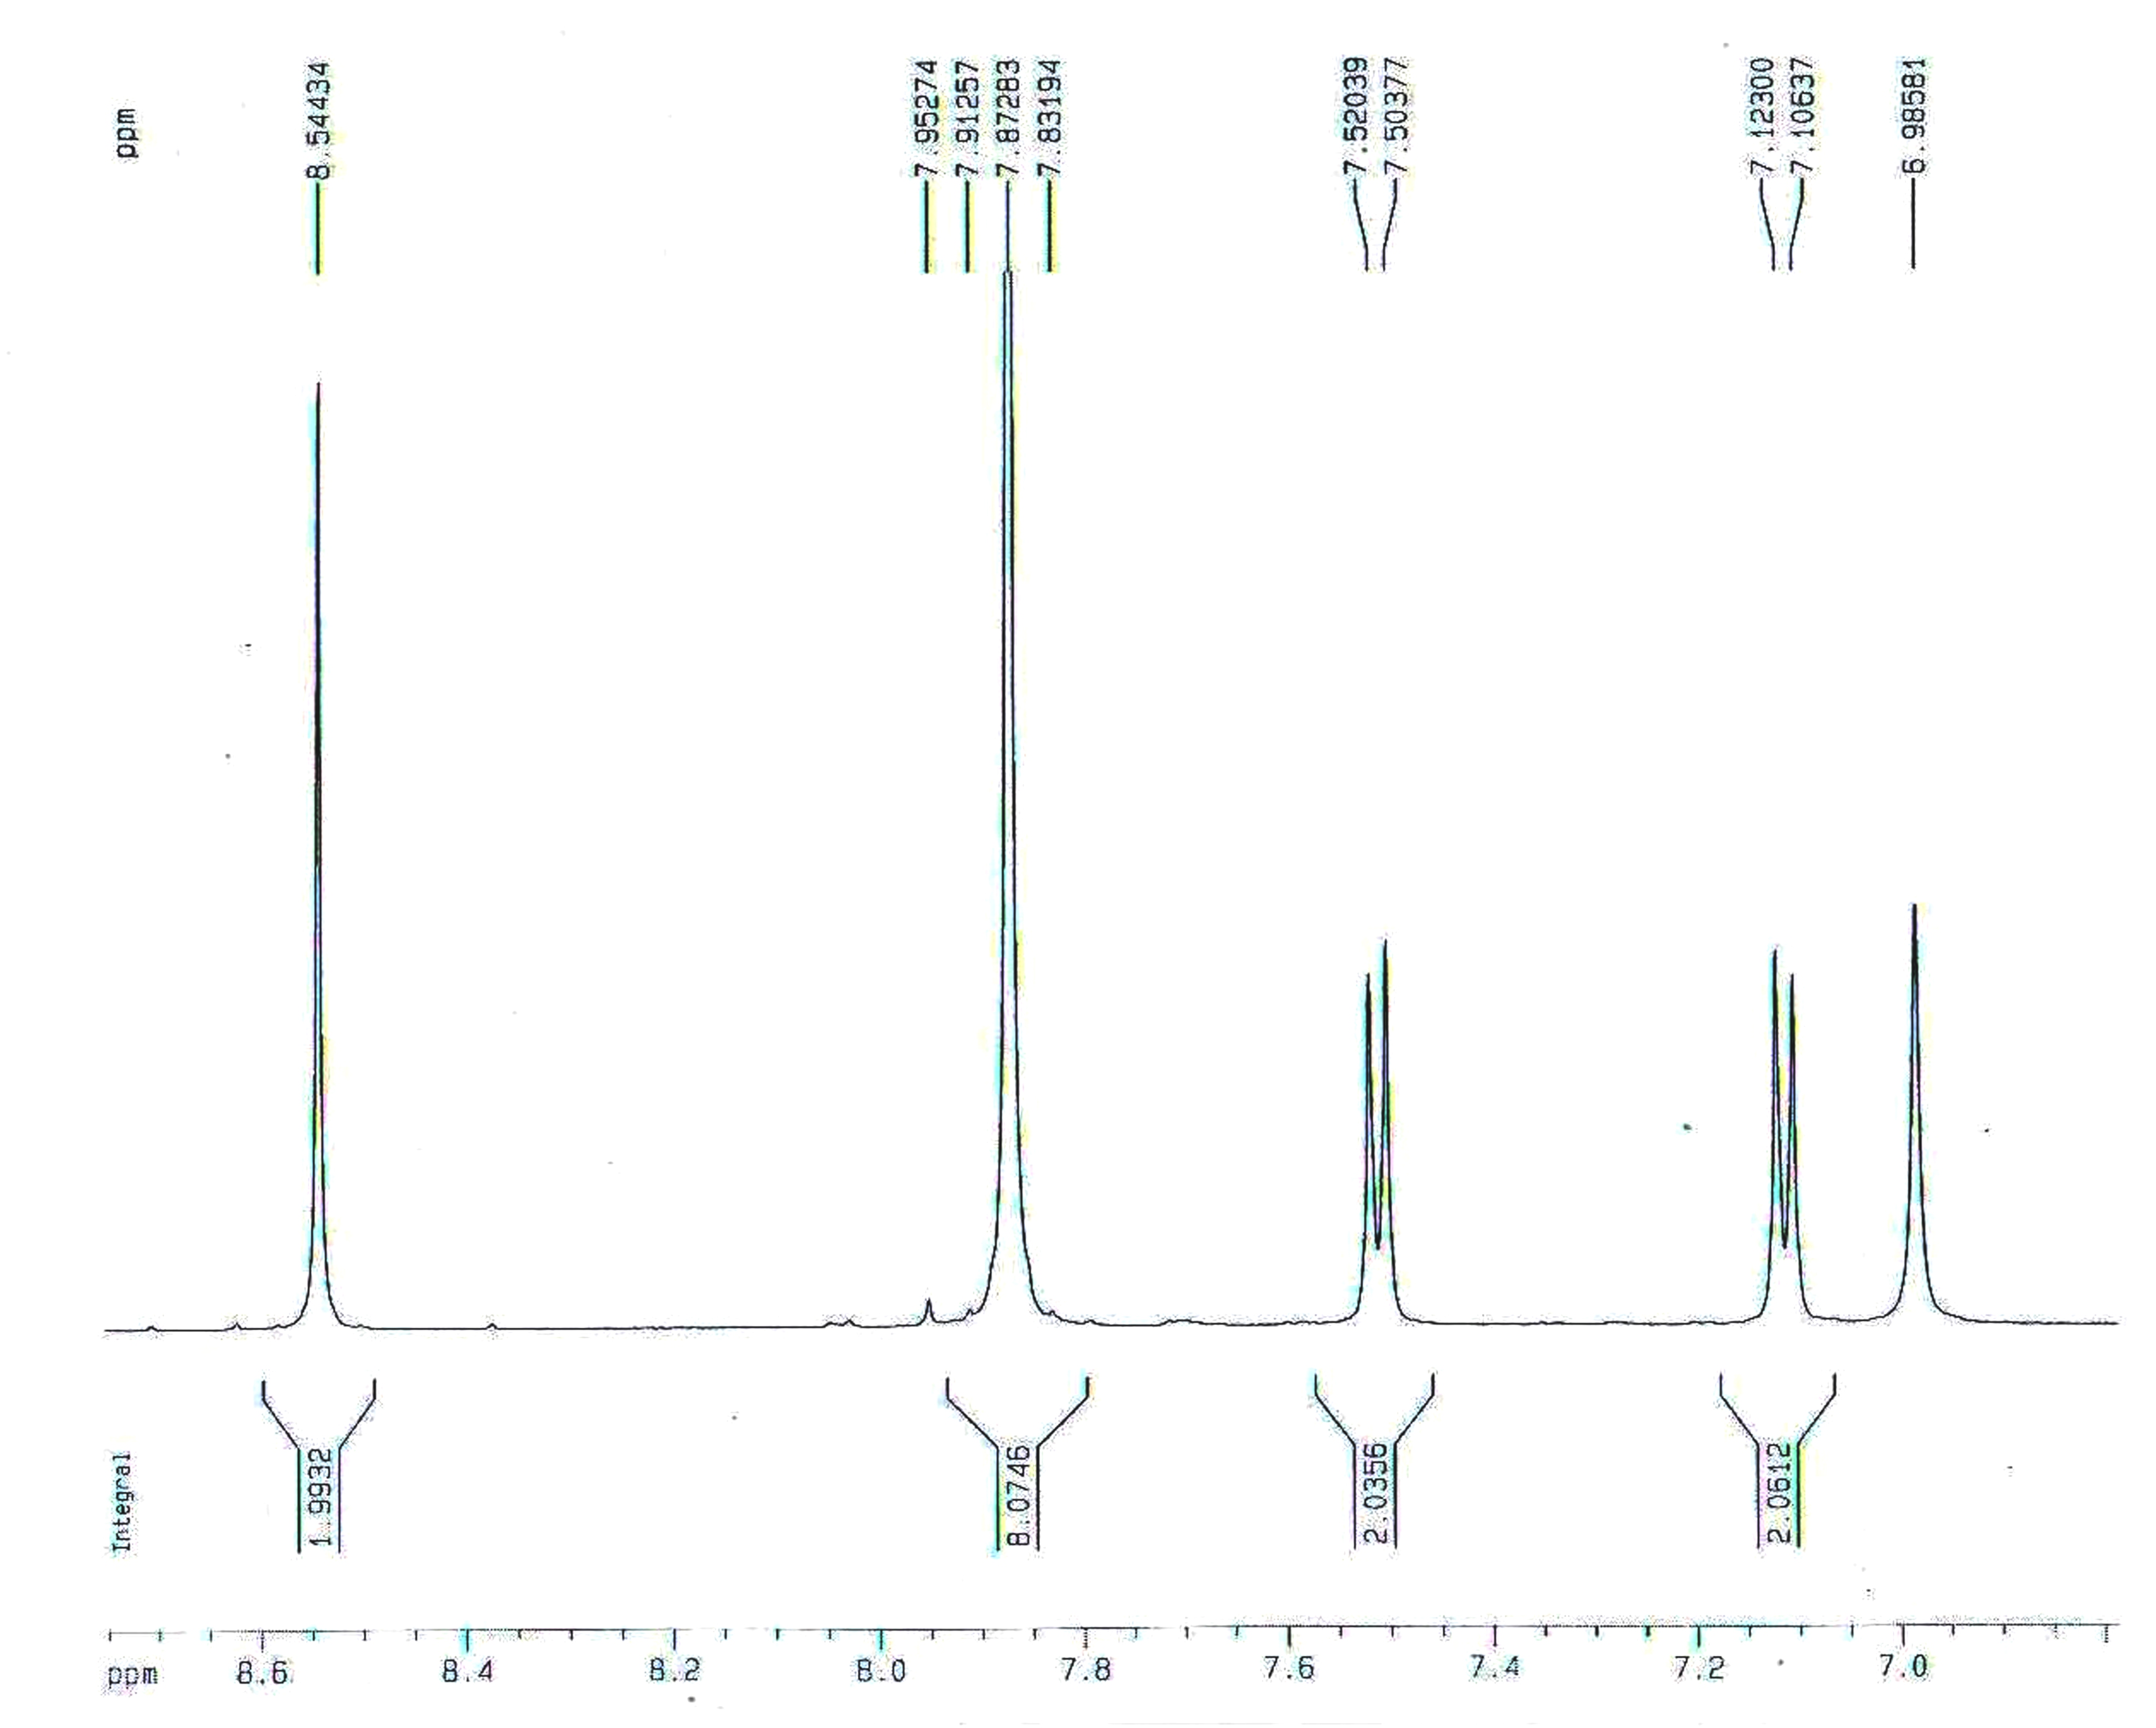


**Figure S9.** 1H NMR spectrum of compound (**4l**)


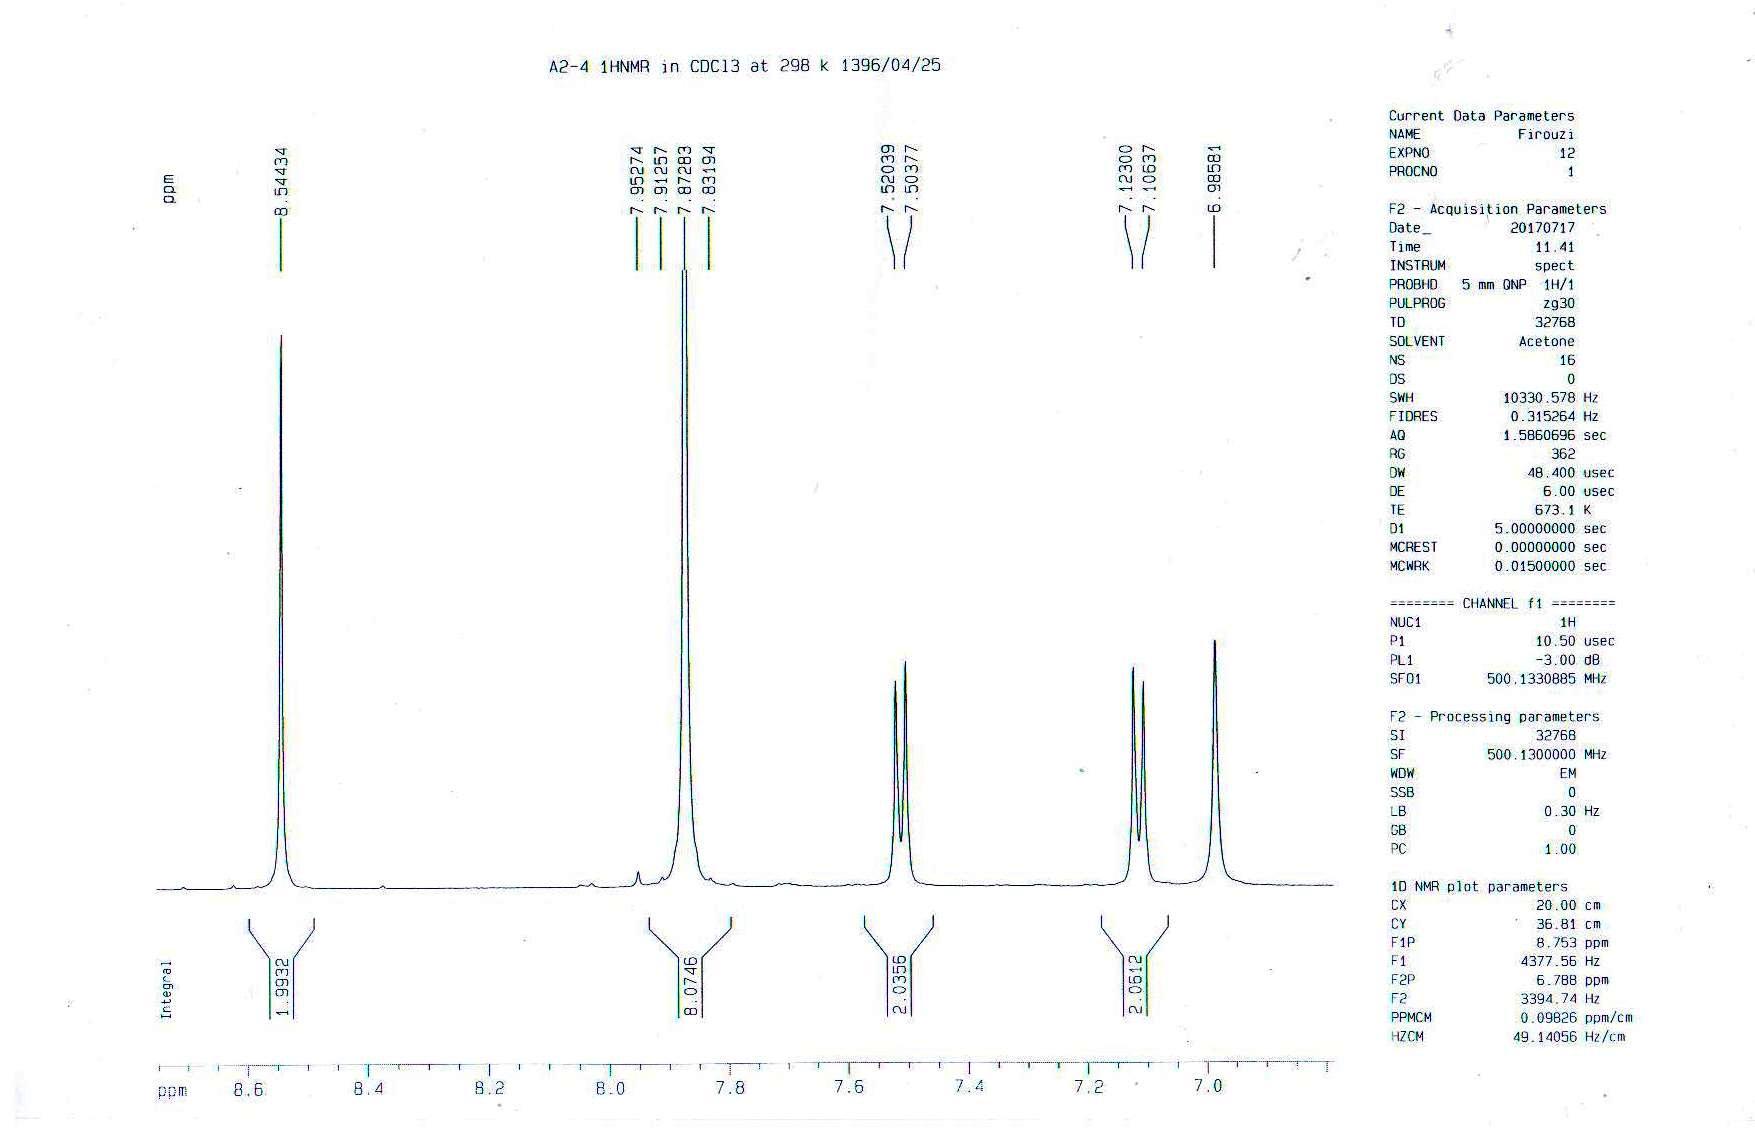

Supplement: Supplementary file 1 [file 13651130]
